# Supplementary material for: Comparative Effectiveness of Anti‐Inflammatory Drug Treatments in Coronary Heart Disease Patients: A Systematic Review and Network Meta‐Analysis
Source: Hindawi journal article supplement (doi:10.1155/2021/5160728), 2021-01-01
Supplement: f1 [file 5160728.f1.zip]

**Supplemental Table 1.** Bias risk assessment of the studies

| Study name          | Random sequence generation | Allocation concealment | Blind participants and personnel | Blind outcome assessment | Incomplete outcome data | Selective reporting |
|---------------------|----------------------------|------------------------|----------------------------------|--------------------------|-------------------------|---------------------|
| APEX-MI             | Low risk                   | Low risk               | Low risk                         | Low risk                 | Low risk                | <i>Unclear</i> risk |
| COMPLY              | Low risk                   | Low risk               | Low risk                         | Low risk                 | Low risk                | Low risk            |
| COMMA               | Low risk                   | Low risk               | Low risk                         | Low risk                 | Low risk                | Low risk            |
| Pexelizumab Study   | Low risk                   | Low risk               | Low risk                         | Low risk                 | Low risk                | Low risk            |
| Investigators PRIMO | Low risk                   | Low risk               | Low risk                         | Low risk                 | Low risk                | Low risk            |
| CABG I              | Low risk                   | Low risk               | Low risk                         | Low risk                 | Low risk                | Low risk            |
| PRIMO CABG II       | Low risk                   | Low risk               | Low risk                         | Low risk                 | Low risk                | Low risk            |
| MRC-ILA Heart       | Low risk                   | Low risk               | Low risk                         | Low risk                 | Low risk                | Low risk            |
| VCU-ART I&II        | Low risk                   | Low risk               | Low risk                         | Low risk                 | Low risk                | Low risk            |
| VCU-ART3            | Low risk                   | Low risk               | Low risk                         | Low risk                 | Low risk                | Low risk            |
| COLCOT              | Low risk                   | Low risk               | Low risk                         | Low risk                 | Low risk                | Low risk            |
| LoDoCo              | Low risk                   | Low risk               | Low risk                         | Low risk                 | Low risk                | Low risk            |
| STABILITY           | Low risk                   | Low risk               | Low risk                         | Low risk                 | Low risk                | Low risk            |
| SOLID               | Low risk                   | Low risk               | Low risk                         | Low risk                 | Low risk                | Low risk            |
| TIMI-52             | Low risk                   | Low risk               | Low risk                         | Low risk                 | Low risk                | Low risk            |
| FRANCIS             | Low risk                   | Low risk               | Low risk                         | Low risk                 | Low risk                | Low risk            |
| VISTA-16            | Low risk                   | Low risk               | Low risk                         | Low risk                 | <i>High</i> risk        | Low risk            |
| CANTOS              | Low risk                   | Low risk               | Low risk                         | Low risk                 | Low risk                | Low risk            |
| SELECT-CABG         | Low risk                   | Low risk               | Low risk                         | Low risk                 | <i>High</i> risk        | <i>Unclear</i> risk |
| LATITUDE MI-60      | Low risk                   | Low risk               | Low risk                         | Low risk                 | Low risk                | Low risk            |
| SOLSTICE            | Low risk                   | Low risk               | Low risk                         | Low risk                 | Low risk                | Low risk            |
