# Supplementary material for: Comparative Effectiveness of Anti‐Inflammatory Drug Treatments in Coronary Heart Disease Patients: A Systematic Review and Network Meta‐Analysis
Source: Hindawi journal article supplement (doi:10.1155/2021/5160728), 2021-01-01
Supplement: f1 [file 5160728.f1.zip]

### **Supplemental figure legends.**

**Supplemental Figure 1.** Forest plot for network meta-analysis comparing the relative efficacy of each anti-inflammatory medication on all-cause death. Use of Pexelizumab is associated with lower risk of all- cause mortality in comparison with Veraspladib (OR 0.62, CI 0.37 – 0.99).

**Supplemental Figure 2.** Forest plot for network meta-analysis comparing the relative efficacies of each anti-inflammatory medication on cardiovascular death.

**Supplemental Figure 3.** Forest plot for network meta-analysis of myocardial infarction. Use of Canakinumab, Colchicine, Darapladib, and Pexelizumab were associated with lower risk of recurrent myocardial infarction in comparison with Anakinra (OR 0.20, CI 0.04 – 0.79; OR 0.21, CI 0.04 – 0.83; OR 0.22, CI 0.04 – 0.81; and OR 0.22, CI 0.05 – 0.82, respectively).

**Supplemental Figure 4.** Forest plot for network meta-analysis of revascularization. Use of Colchicine significantly reduced the risk of revascularization in comparison to both Anakinra and Darapladib (OR 0.31, CI 0.11 – 0.84; and OR 0.52, CI 0.29 – 0.93, respectively).

**Supplemental Figure 5.** Forest plot for network meta-analysis of stroke. Use of Colchicine was associated with significant reduced risk of stroke events after myocardial infarction in comparison to several anti-inflammatory medications including: Darapladib (OR 0.23, CI 0.07-0.57), Pexelizumab (OR 0.23, CI 0.07- 0.64), Losmapimod (OR 0.25, CI 0.07-0.85), Canakinumab (OR 0.30, CI 0.09-0.81), and Veraspladib (OR 0.26, CI 0.07-0.97).

**Supplemental Figure 6.** Forest plot for network meta-analysis comparing the relative efficacy of each anti-inflammatory medication on major adverse cardiac and cerebrovascular events (MAACE). Colchicine use was associated with significantly lower risk of MACCE when compared to Darapladib (OR 0.69, CI 0.44-0.98), Losmapimod (OR 0.60, CI 0.37-0.93), Anakinra (OR 0.28 CI 0.10 – 0.70) and Varespladib (OR 0.53, CI

0.32-0.83). Both Canakinumab and Pexelizumab were associated with reduced risk of MACCE (OR 0.37, CI 0.13 – 0.95 and OR 0.39, CI 0.14 – 0.96; respectively).

**Supplemental Figure 7.** network plot of treatments included in this network meta-analysis. Circles represent the intervention as a node in the network, lines represent direct comparisons using randomized clinical trials (RCTs), and the thickness of lines corresponds to the number of (RCTs) included in each comparison.

**Supplemental Figure 8.** Funnel plots of odds ratios and standard errors to assess the publication bias of all-cause mortality, cardiac mortality, revascularization, stroke, recurrent myocardial infarction, and major adverse cardiac and cerebrovascular events (MACCE).

**Supplemental Figure 9.** Consistency plot for all-cause mortality, cardiac mortality, revascularization, stroke, recurrent myocardial infarction, and major adverse cardiac and cerebrovascular events (MACCE).

All-cause death

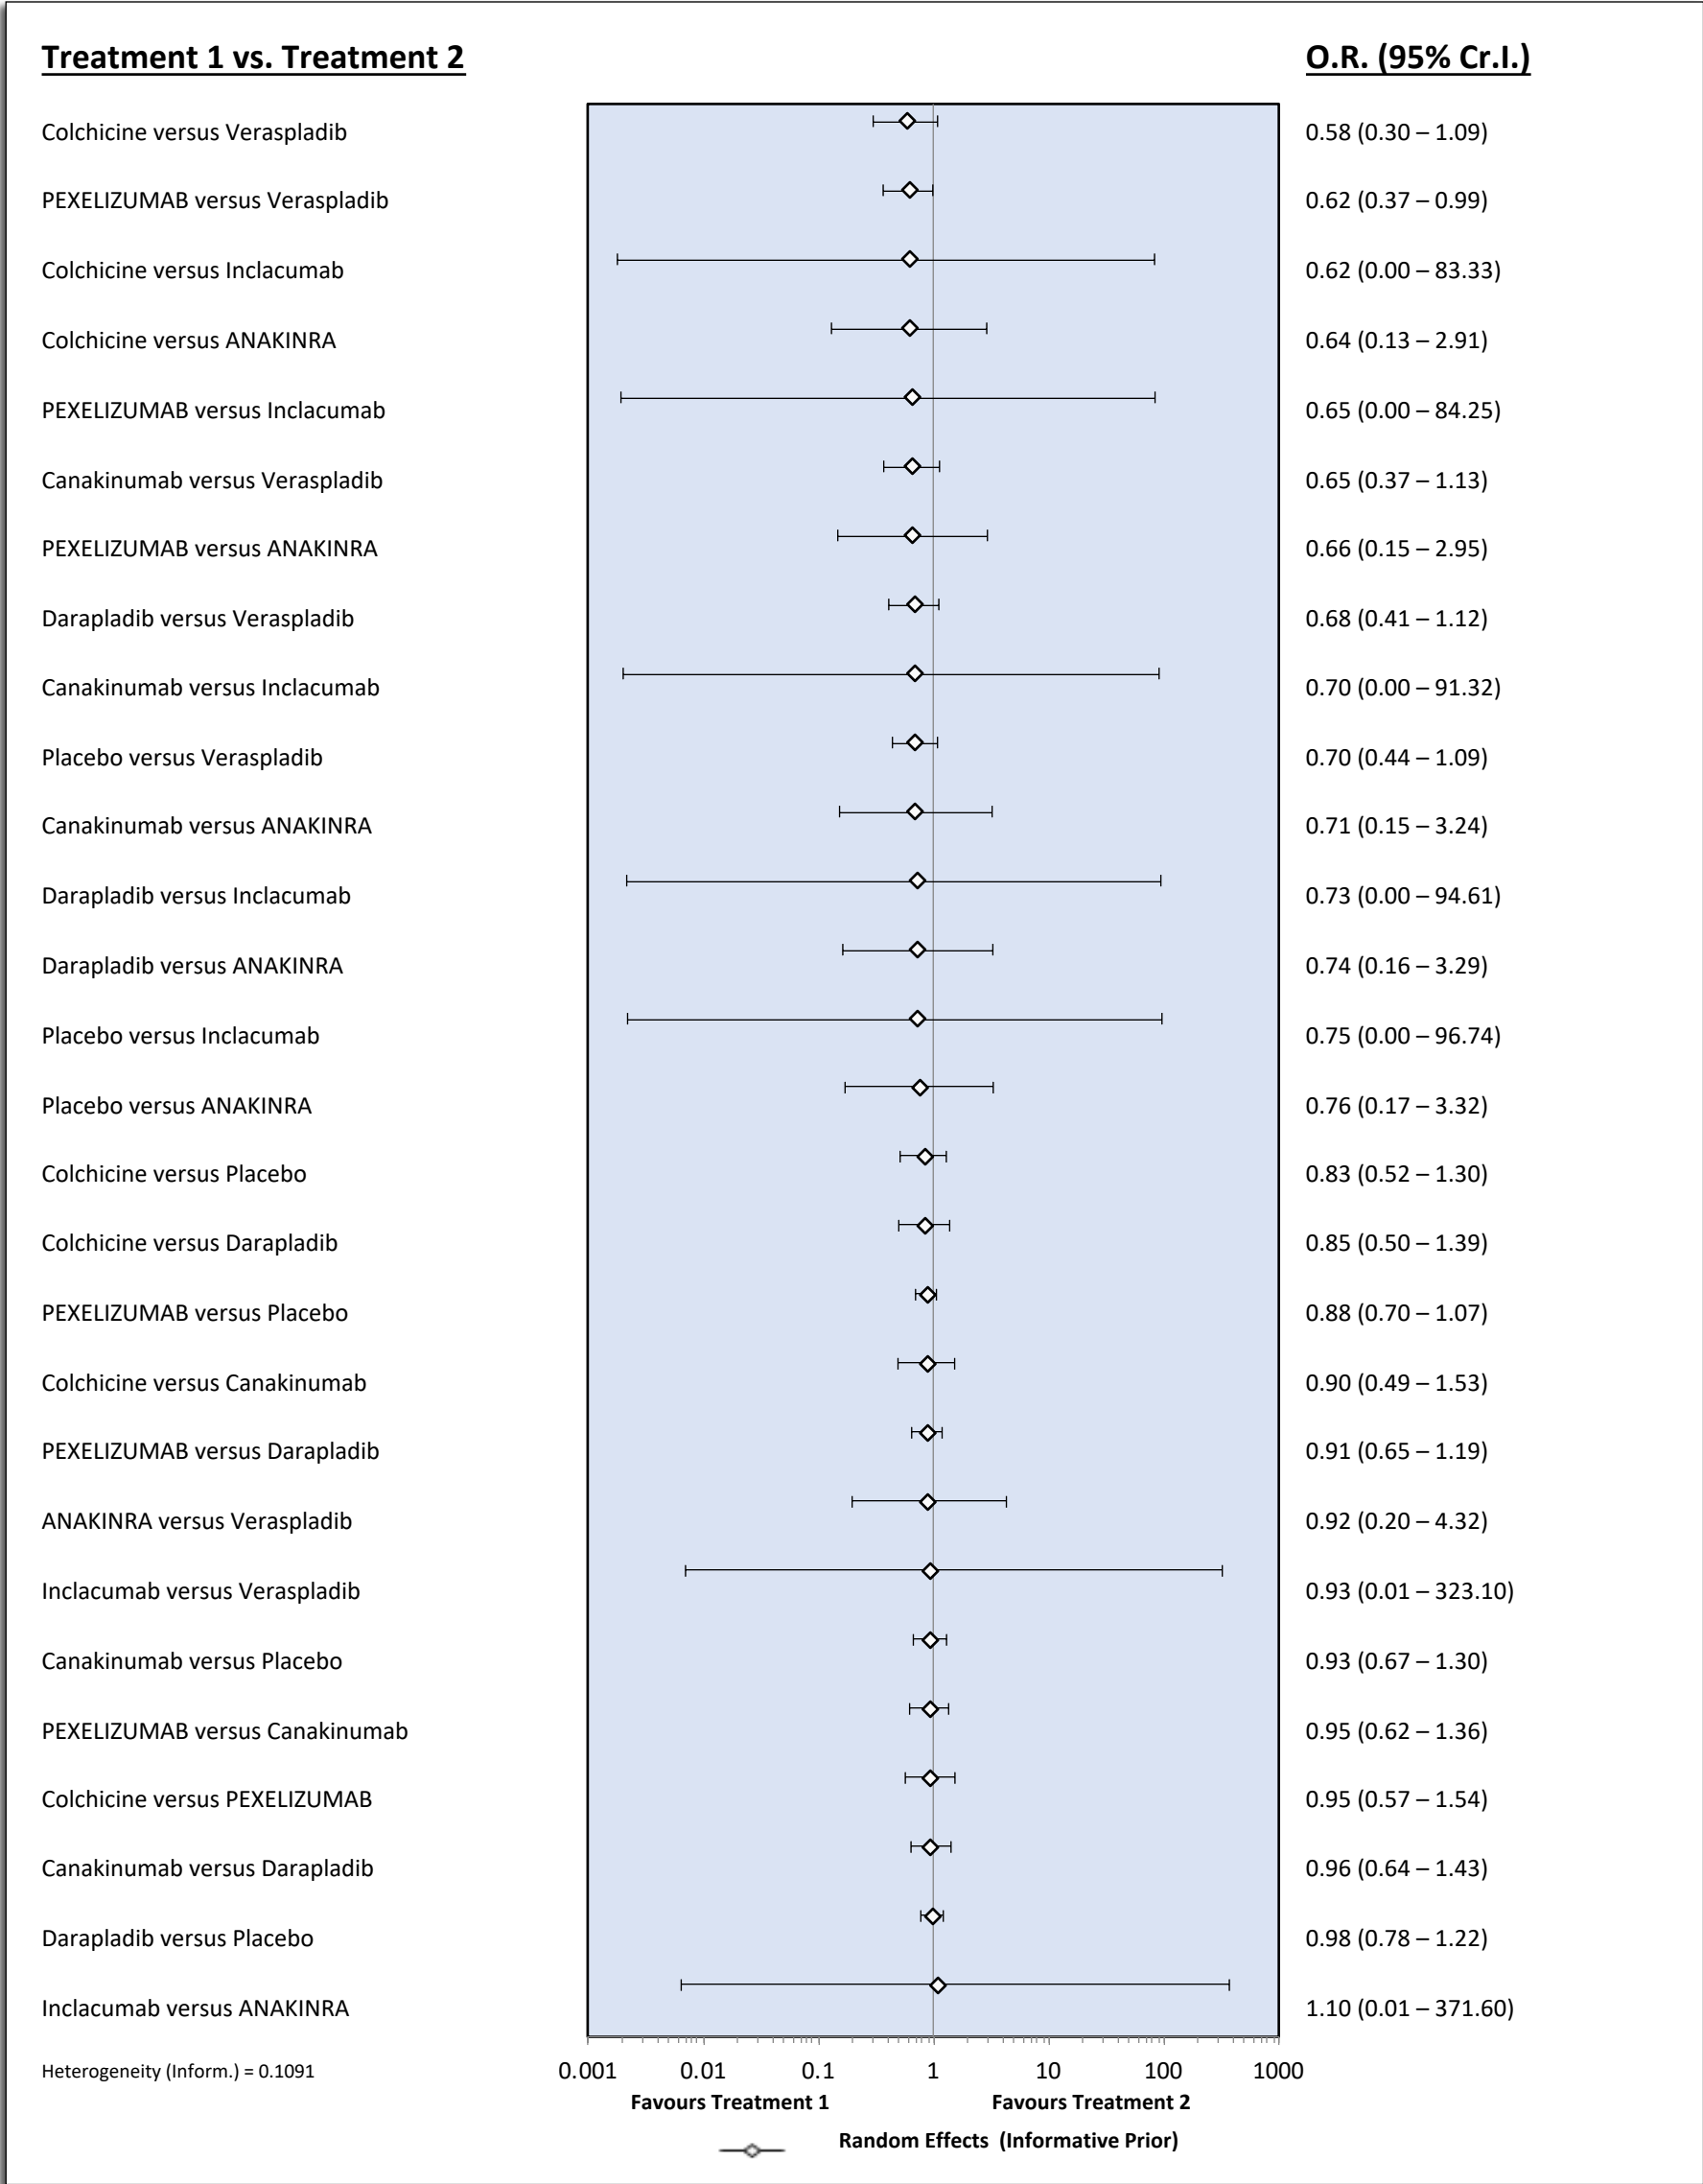

Supplemental Figure 1

# All-cause death

|                        |                        |                        |                        |                        |                         |                       |             |
|------------------------|------------------------|------------------------|------------------------|------------------------|-------------------------|-----------------------|-------------|
| Colchicine             |                        |                        |                        |                        |                         |                       |             |
| 0.95<br>(0.57 – 1.54)  | PEXELIZUMAB            |                        |                        |                        |                         |                       |             |
| 0.90<br>(0.49 – 1.53)  | 0.95<br>(0.62 – 1.36)  | Canakinumab            |                        |                        |                         |                       |             |
| 0.85<br>(0.50 – 1.39)  | 0.91<br>(0.65 – 1.19)  | 0.96<br>(0.64 – 1.43)  | Darapladib             |                        |                         |                       |             |
| 0.83<br>(0.52 – 1.30)  | 0.88<br>(0.70 – 1.07)  | 0.93<br>(0.67 – 1.30)  | 0.98<br>(0.78 – 1.22)  | Placebo                |                         |                       |             |
| 0.62<br>(0.00 – 83.33) | 0.65<br>(0.00 – 84.25) | 0.70<br>(0.00 – 91.32) | 0.73<br>(0.00 – 94.61) | 0.75<br>(0.00 – 96.74) | Inclacumab              |                       |             |
| 0.64<br>(0.13 – 2.91)  | 0.66<br>(0.15 – 2.95)  | 0.71<br>(0.15 – 3.24)  | 0.74<br>(0.16 – 3.29)  | 0.76<br>(0.17 – 3.32)  | 1.10<br>(0.01 – 371.60) | ANAKINRA              |             |
| 0.58<br>(0.30 – 1.09)  | 0.62<br>(0.37 – 0.99)  | 0.65<br>(0.37 – 1.13)  | 0.68<br>(0.41 – 1.12)  | 0.70<br>(0.44 – 1.09)  | 0.93<br>(0.01 – 323.10) | 0.92<br>(0.20 – 4.32) | Veraspladib |

# Cardiovascular death

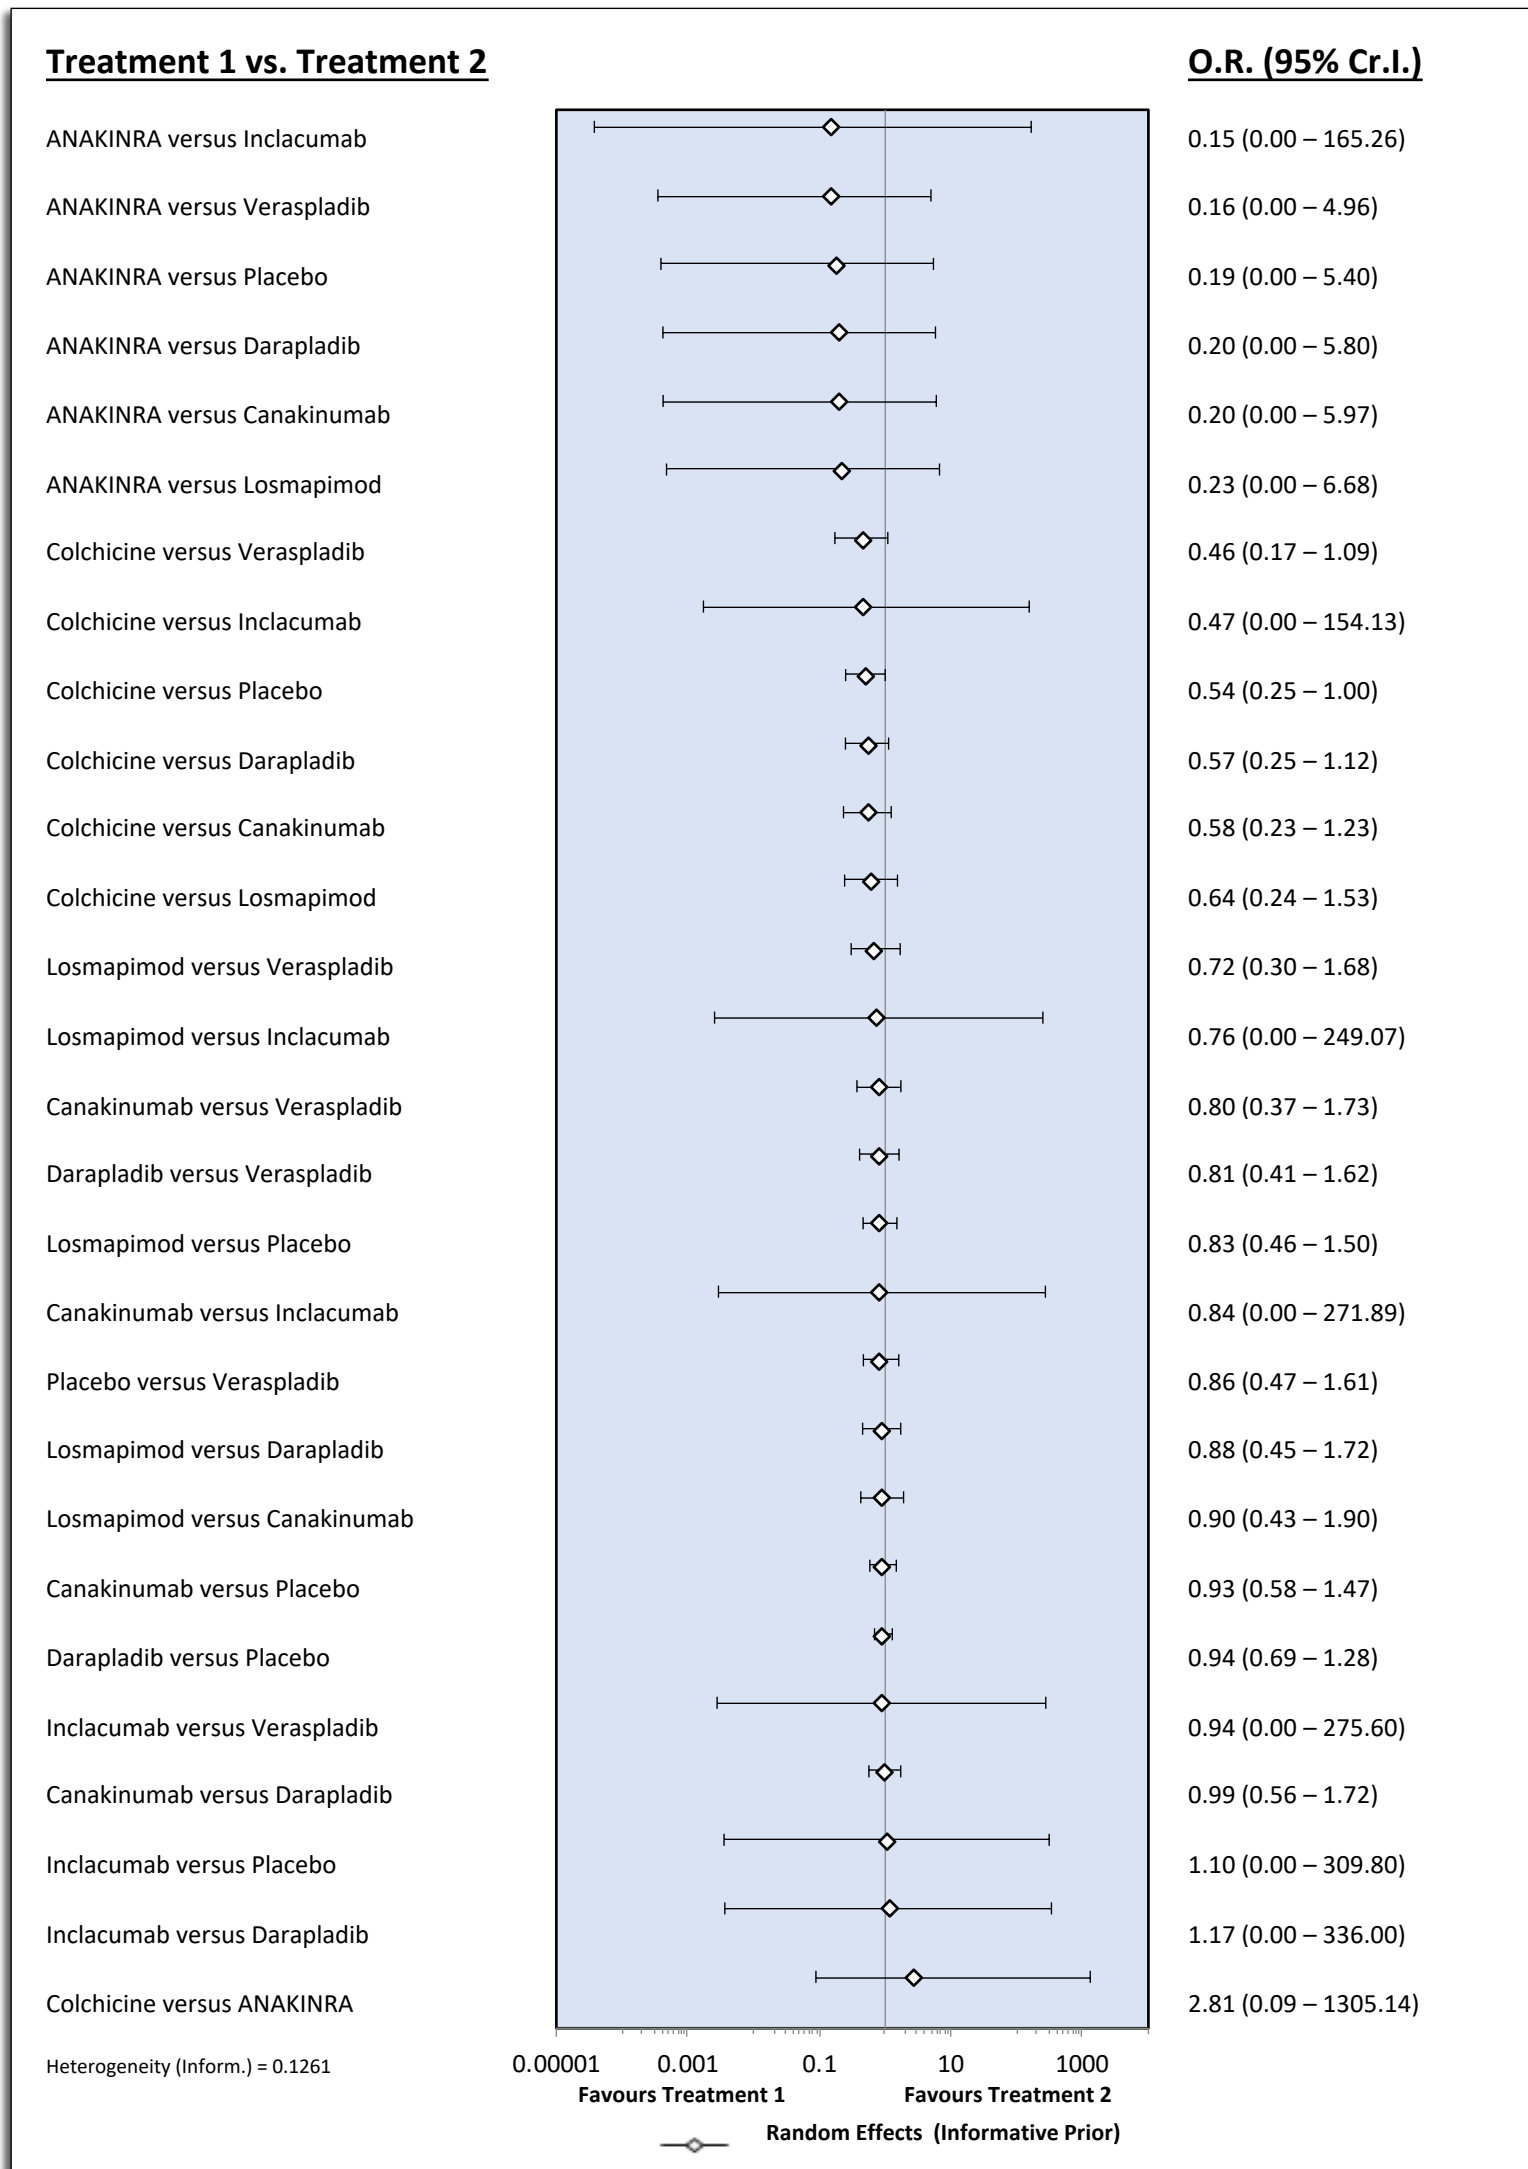

## Supplemental Figure 2

# Cardiovascular death

|                          |                         |                         |                         |                         |                       |                       |             |
|--------------------------|-------------------------|-------------------------|-------------------------|-------------------------|-----------------------|-----------------------|-------------|
| Colchicine               |                         |                         |                         |                         |                       |                       |             |
| 2.81<br>(0.09 – 1305.14) | ANAKINRA                |                         |                         |                         |                       |                       |             |
| 0.64<br>(0.24 – 1.53)    | 0.23<br>(0.00 – 6.68)   | Losmapimod              |                         |                         |                       |                       |             |
| 0.58<br>(0.23 – 1.23)    | 0.20<br>(0.00 – 5.97)   | 0.90<br>(0.43 – 1.90)   | Canakinumab             |                         |                       |                       |             |
| 0.47<br>(0.00 – 154.13)  | 0.15<br>(0.00 – 165.26) | 0.76<br>(0.00 – 249.07) | 0.84<br>(0.00 – 271.89) | Inclacumab              |                       |                       |             |
| 0.57<br>(0.25 – 1.12)    | 0.20<br>(0.00 – 5.80)   | 0.88<br>(0.45 – 1.72)   | 0.99<br>(0.56 – 1.72)   | 1.17<br>(0.00 – 336.00) | Darapladib            |                       |             |
| 0.54<br>(0.25 – 1.00)    | 0.19<br>(0.00 – 5.40)   | 0.83<br>(0.46 – 1.50)   | 0.93<br>(0.58 – 1.47)   | 1.10<br>(0.00 – 309.80) | 0.94<br>(0.69 – 1.28) | Placebo               |             |
| 0.46<br>(0.17 – 1.09)    | 0.16<br>(0.00 – 4.96)   | 0.72<br>(0.30 – 1.68)   | 0.80<br>(0.37 – 1.73)   | 0.94<br>(0.00 – 275.60) | 0.81<br>(0.41 – 1.62) | 0.86<br>(0.47 – 1.61) | Veraspladib |

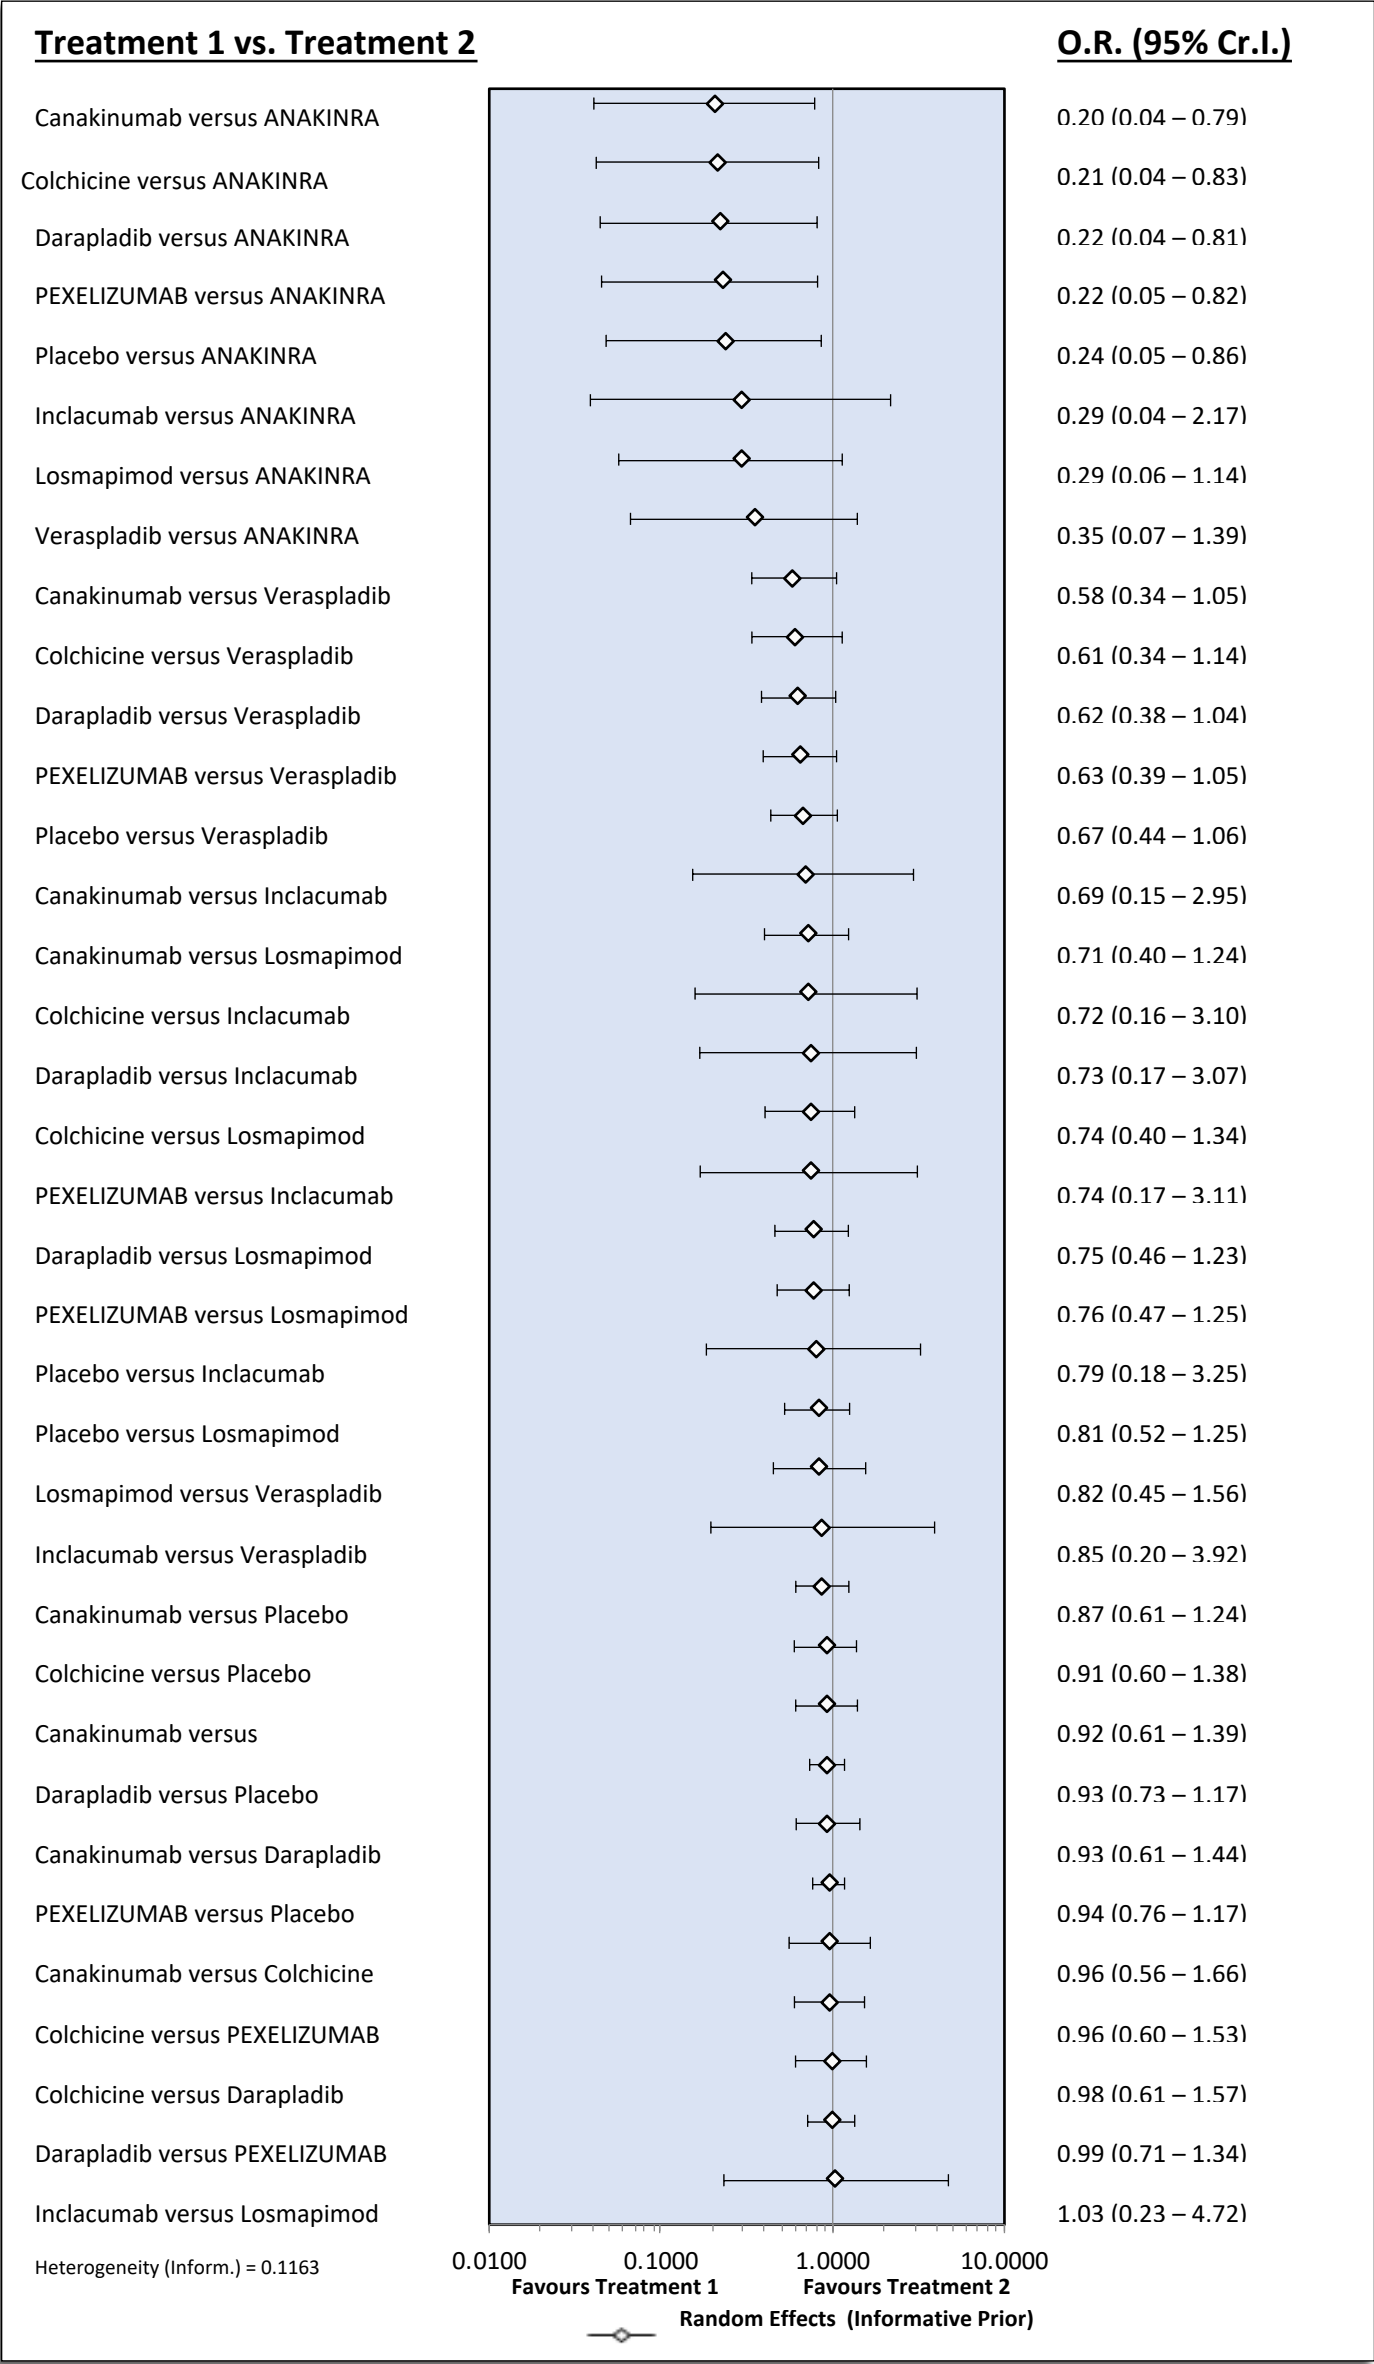

Supplemental Figure 3

MI

|                       |                       |                       |                       |                       |                       |                       |                       |          |
|-----------------------|-----------------------|-----------------------|-----------------------|-----------------------|-----------------------|-----------------------|-----------------------|----------|
| Canakinumab           |                       |                       |                       |                       |                       |                       |                       |          |
| 0.96<br>(0.56 – 1.66) | Colchicine            |                       |                       |                       |                       |                       |                       |          |
| 0.93<br>(0.61 – 1.44) | 0.98<br>(0.61 – 1.57) | Darapladib            |                       |                       |                       |                       |                       |          |
| 0.92<br>(0.61 – 1.39) | 0.96<br>(0.60 – 1.53) | 0.99<br>(0.71 – 1.34) | PEXELIZUMAB           |                       |                       |                       |                       |          |
| 0.87<br>(0.61 – 1.24) | 0.91<br>(0.60 – 1.38) | 0.93<br>(0.73 – 1.17) | 0.94<br>(0.76 – 1.17) | Placebo               |                       |                       |                       |          |
| 0.69<br>(0.15 – 2.95) | 0.72<br>(0.16 – 3.10) | 0.73<br>(0.17 – 3.07) | 0.74<br>(0.17 – 3.11) | 0.79<br>(0.18 – 3.25) | Inclacumab            |                       |                       |          |
| 0.71<br>(0.40 – 1.24) | 0.74<br>(0.40 – 1.34) | 0.75<br>(0.46 – 1.23) | 0.76<br>(0.47 – 1.25) | 0.81<br>(0.52 – 1.25) | 1.03<br>(0.23 – 4.72) | Losmapimod            |                       |          |
| 0.58<br>(0.34 – 1.05) | 0.61<br>(0.34 – 1.14) | 0.62<br>(0.38 – 1.04) | 0.63<br>(0.39 – 1.05) | 0.67<br>(0.44 – 1.06) | 0.85<br>(0.20 – 3.92) | 0.82<br>(0.45 – 1.56) | Veraspladib           |          |
| 0.20<br>(0.04 – 0.79) | 0.21<br>(0.04 – 0.83) | 0.22<br>(0.04 – 0.81) | 0.22<br>(0.05 – 0.82) | 0.24<br>(0.05 – 0.86) | 0.29<br>(0.04 – 2.17) | 0.29<br>(0.06 – 1.14) | 0.35<br>(0.07 – 1.39) | ANAKINRA |



Revascularization

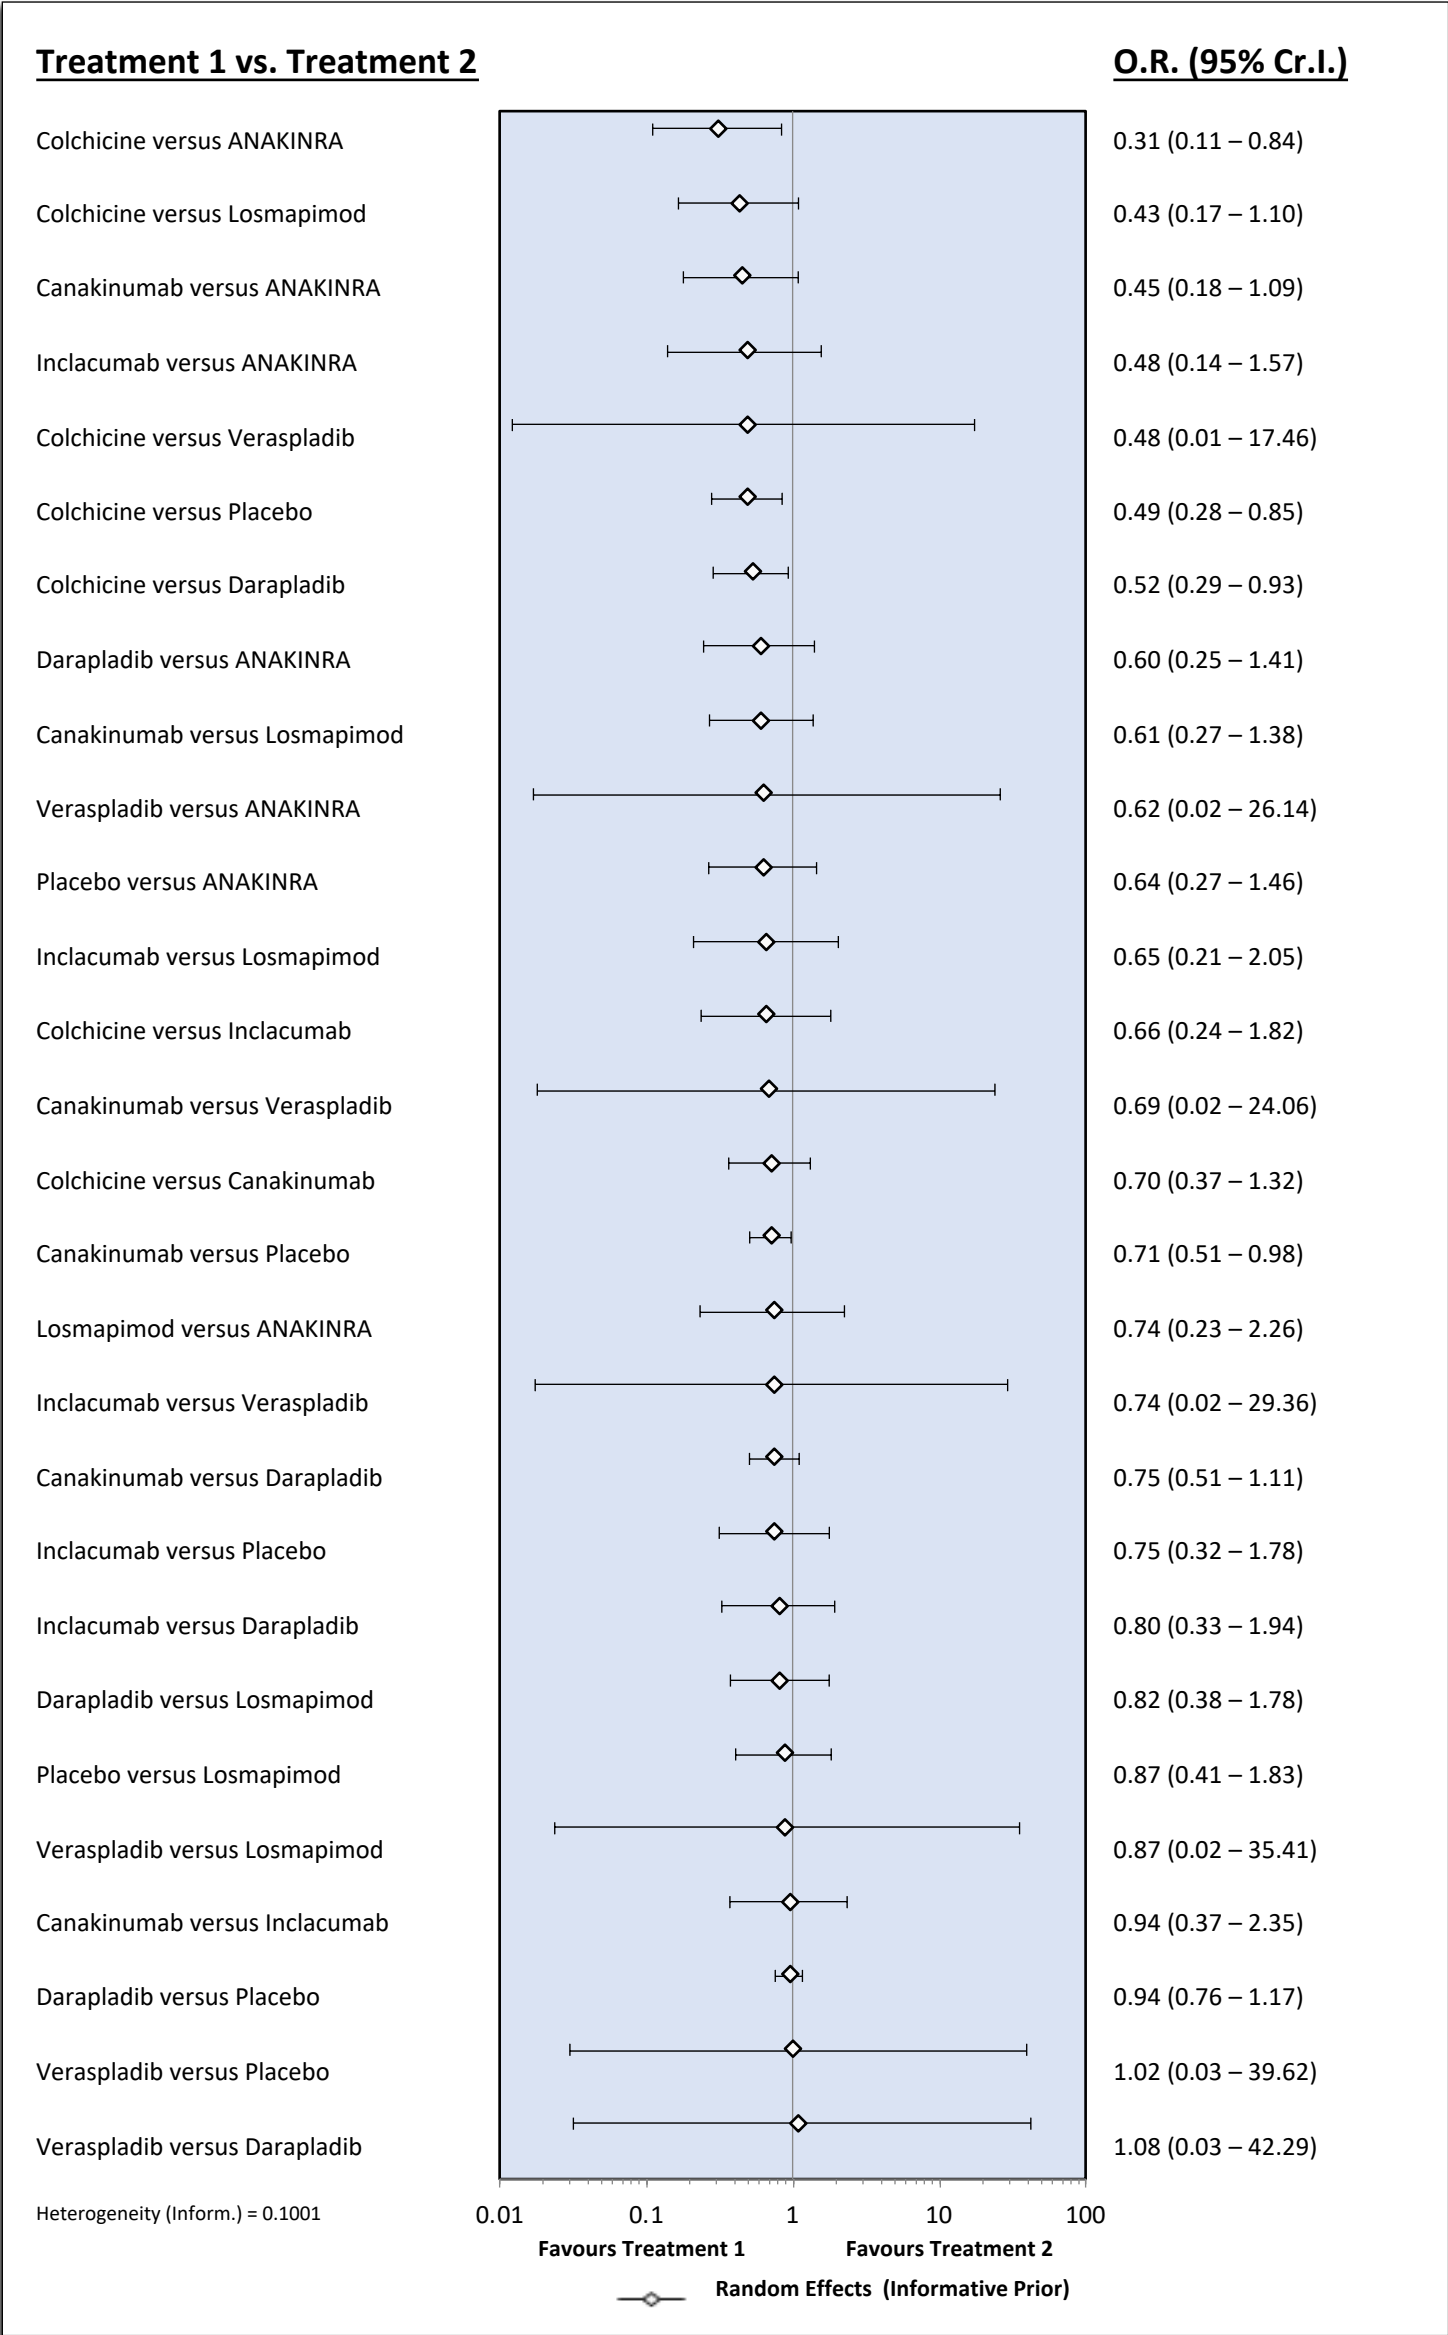

Supplemental Figure 4

Revascularization

|                        |                        |                        |                        |                       |                       |                       |          |
|------------------------|------------------------|------------------------|------------------------|-----------------------|-----------------------|-----------------------|----------|
| Colchicine             |                        |                        |                        |                       |                       |                       |          |
| 0.70<br>(0.37 – 1.32)  | Canakinumab            |                        |                        |                       |                       |                       |          |
| 0.66<br>(0.24 – 1.82)  | 0.94<br>(0.37 – 2.35)  | Inclacumab             |                        |                       |                       |                       |          |
| 0.48<br>(0.01 – 17.46) | 0.69<br>(0.02 – 24.06) | 0.74<br>(0.02 – 29.36) | Veraspladib            |                       |                       |                       |          |
| 0.52<br>(0.29 – 0.93)  | 0.75<br>(0.51 – 1.11)  | 0.80<br>(0.33 – 1.94)  | 1.08<br>(0.03 – 42.29) | Darapladib            |                       |                       |          |
| 0.49<br>(0.28 – 0.85)  | 0.71<br>(0.51 – 0.98)  | 0.75<br>(0.32 – 1.78)  | 1.02<br>(0.03 – 39.62) | 0.94<br>(0.76 – 1.17) | Placebo               |                       |          |
| 0.43<br>(0.17 – 1.10)  | 0.61<br>(0.27 – 1.38)  | 0.65<br>(0.21 – 2.05)  | 0.87<br>(0.02 – 35.41) | 0.82<br>(0.38 – 1.78) | 0.87<br>(0.41 – 1.83) | Losmapimod            |          |
| 0.31<br>(0.11 – 0.84)  | 0.45<br>(0.18 – 1.09)  | 0.48<br>(0.14 – 1.57)  | 0.62<br>(0.02 – 26.14) | 0.60<br>(0.25 – 1.41) | 0.64<br>(0.27 – 1.46) | 0.74<br>(0.23 – 2.26) | ANAKINRA |

# Stroke

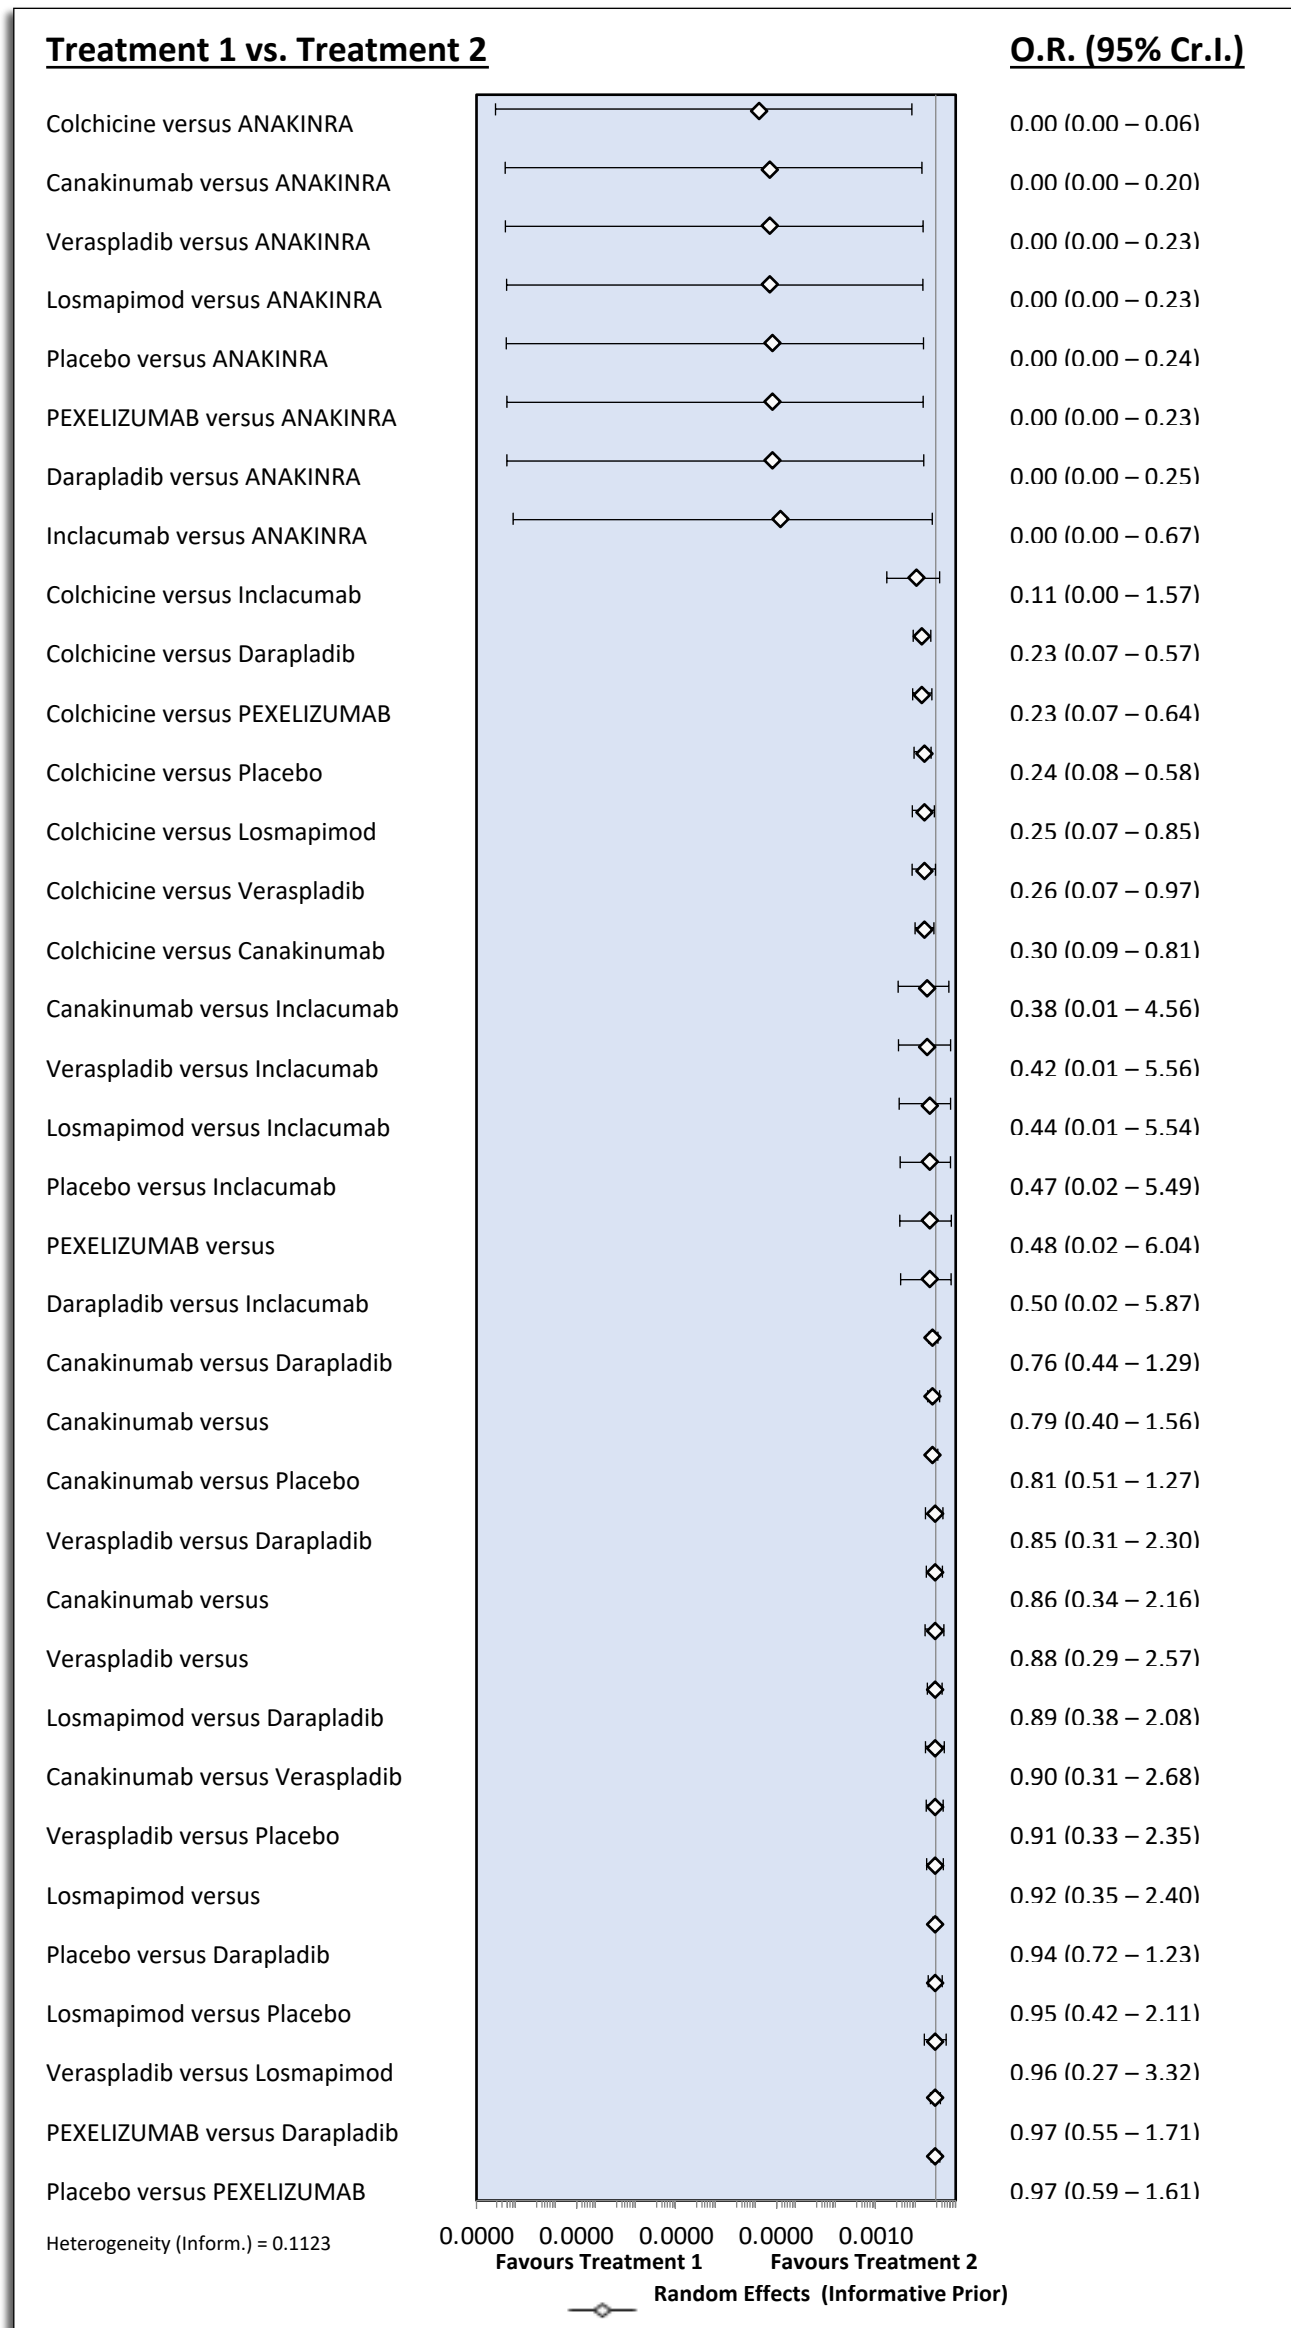

## Supplemental Figure 5

Stroke

|                       |                       |                       |                       |                       |                       |                       |                       |          |
|-----------------------|-----------------------|-----------------------|-----------------------|-----------------------|-----------------------|-----------------------|-----------------------|----------|
| Colchicine            |                       |                       |                       |                       |                       |                       |                       |          |
| 0.30<br>(0.09 – 0.81) | Canakinumab           |                       |                       |                       |                       |                       |                       |          |
| 0.26<br>(0.07 – 0.97) | 0.90<br>(0.31 – 2.68) | Veraspladib           |                       |                       |                       |                       |                       |          |
| 0.25<br>(0.07 – 0.85) | 0.86<br>(0.34 – 2.16) | 0.96<br>(0.27 – 3.32) | Losmapimod            |                       |                       |                       |                       |          |
| 0.24<br>(0.08 – 0.58) | 0.81<br>(0.51 – 1.27) | 0.91<br>(0.33 – 2.35) | 0.95<br>(0.42 – 2.11) | Placebo               |                       |                       |                       |          |
| 0.23<br>(0.07 – 0.64) | 0.79<br>(0.40 – 1.56) | 0.88<br>(0.29 – 2.57) | 0.92<br>(0.35 – 2.40) | 0.97<br>(0.59 – 1.61) | PEXELIZUMAB           |                       |                       |          |
| 0.23<br>(0.07 – 0.57) | 0.76<br>(0.44 – 1.29) | 0.85<br>(0.31 – 2.30) | 0.89<br>(0.38 – 2.08) | 0.94<br>(0.72 – 1.23) | 0.97<br>(0.55 – 1.71) | Darapladib            |                       |          |
| 0.11<br>(0.00 – 1.57) | 0.38<br>(0.01 – 4.56) | 0.42<br>(0.01 – 5.56) | 0.44<br>(0.01 – 5.54) | 0.47<br>(0.02 – 5.49) | 0.48<br>(0.02 – 6.04) | 0.50<br>(0.02 – 5.87) | Inclacumab            |          |
| 0.00<br>(0.00 – 0.06) | 0.00<br>(0.00 – 0.20) | 0.00<br>(0.00 – 0.23) | 0.00<br>(0.00 – 0.23) | 0.00<br>(0.00 – 0.24) | 0.00<br>(0.00 – 0.23) | 0.00<br>(0.00 – 0.25) | 0.00<br>(0.00 – 0.67) | ANAKINRA |

MACCE

Treatment 1 vs. Treatment 2

O.R. (95% Cr.I.)

- Colchicine versus ANAKINRA
- Canakinumab versus ANAKINRA
- PEXELIZUMAB versus ANAKINRA
- Darapladib versus ANAKINRA
- Placebo versus ANAKINRA
- Inclacumab versus ANAKINRA
- Losmapimod versus ANAKINRA
- Veraspladib versus ANAKINRA
- Colchicine versus Veraspladib
- Colchicine versus Losmapimod
- Colchicine versus Inclacumab
- Colchicine versus Placebo
- Colchicine versus Darapladib
- Canakinumab versus Veraspladib
- Colchicine versus PEXELIZUMAB
- PEXELIZUMAB versus Veraspladib
- Colchicine versus Canakinumab
- Darapladib versus Veraspladib
- Canakinumab versus Losmapimod
- Placebo versus Veraspladib
- Inclacumab versus Veraspladib
- PEXELIZUMAB versus Losmapimod
- Canakinumab versus Inclacumab
- Darapladib versus Losmapimod
- Canakinumab versus Placebo
- Losmapimod versus Veraspladib
- Placebo versus Losmapimod
- PEXELIZUMAB versus Inclacumab
- Canakinumab versus Darapladib
- Inclacumab versus Losmapimod
- PEXELIZUMAB versus Placebo
- PEXELIZUMAB versus Darapladib
- Darapladib versus Inclacumab
- Canakinumab versus PEXELIZUMAB
- Darapladib versus Placebo
- Inclacumab versus Placebo

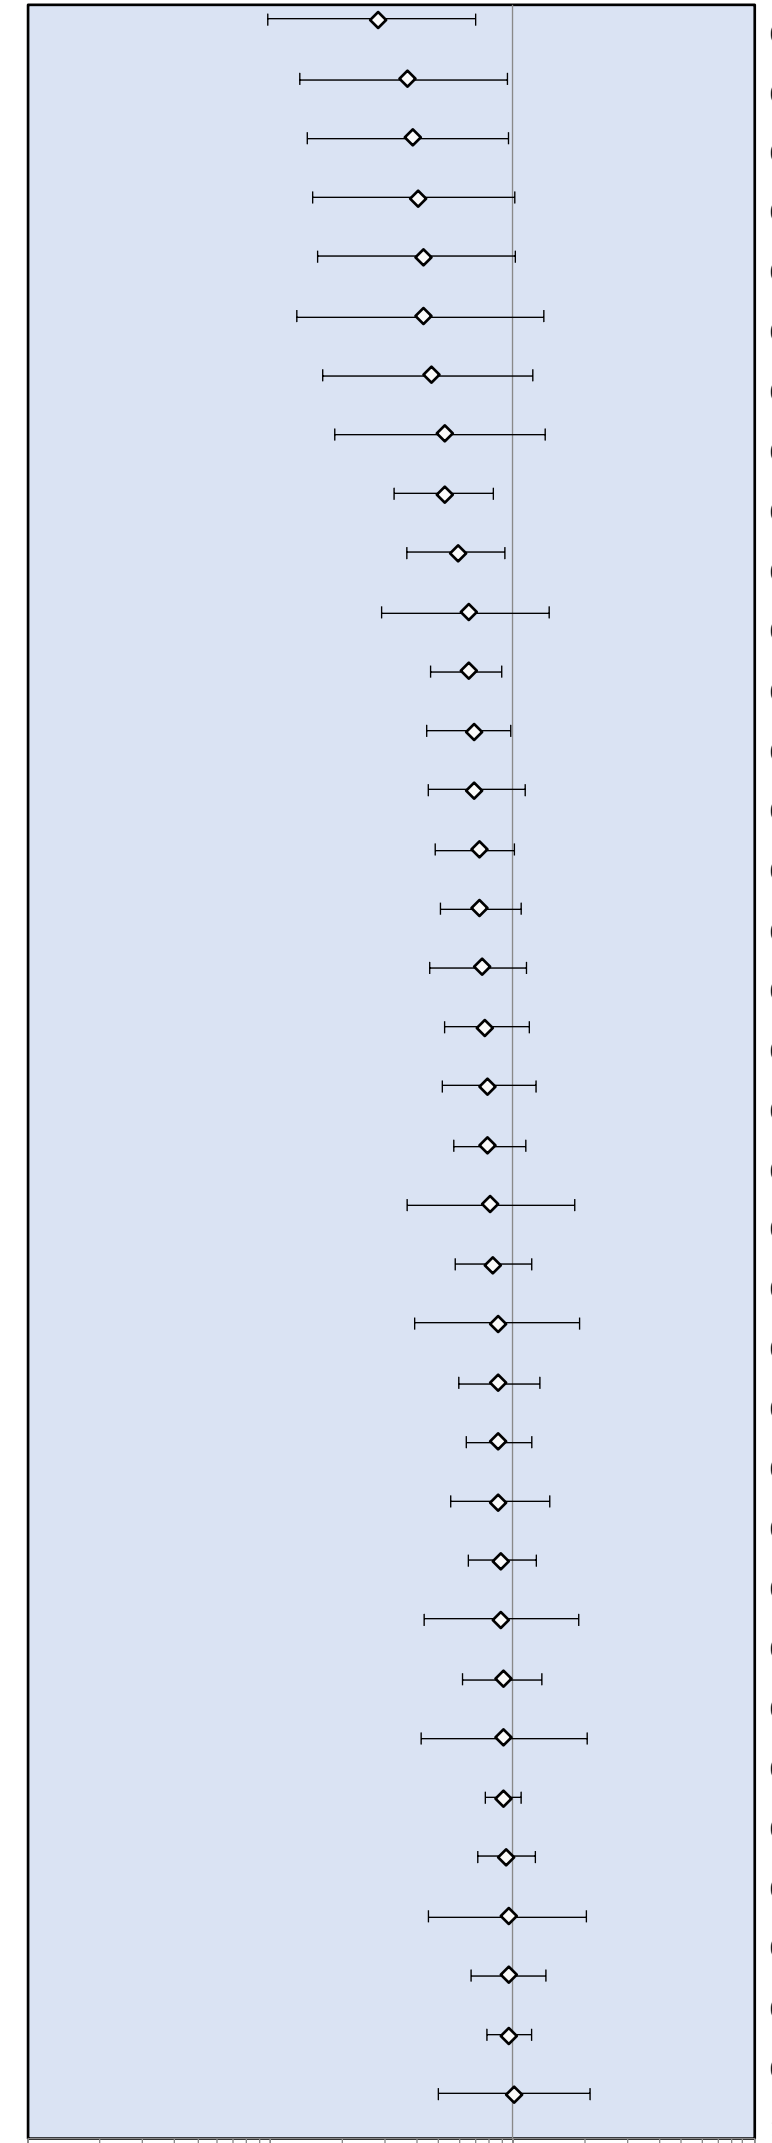

Heterogeneity (Inform.) = 0.1098

0.01 0.1 1 10  
Favours Treatment 1 Favours Treatment 2  
Random Effects (Informative Prior)

Supplemental Figure 6

MACCE

|                       |                       |                       |                       |                       |                       |                       |                       |          |
|-----------------------|-----------------------|-----------------------|-----------------------|-----------------------|-----------------------|-----------------------|-----------------------|----------|
| Colchicine            |                       |                       |                       |                       |                       |                       |                       |          |
| 0.76<br>(0.46 – 1.14) | Canakinumab           |                       |                       |                       |                       |                       |                       |          |
| 0.72<br>(0.48 – 1.02) | 0.96<br>(0.67 – 1.37) | PEXELIZUMAB           |                       |                       |                       |                       |                       |          |
| 0.69<br>(0.44 – 0.98) | 0.91<br>(0.62 – 1.32) | 0.95<br>(0.72 – 1.24) | Darapladib            |                       |                       |                       |                       |          |
| 0.65<br>(0.29 – 1.42) | 0.87<br>(0.39 – 1.89) | 0.91<br>(0.43 – 1.88) | 0.96<br>(0.45 – 2.02) | Inclacumab            |                       |                       |                       |          |
| 0.67<br>(0.46 – 0.90) | 0.88<br>(0.64 – 1.20) | 0.92<br>(0.77 – 1.08) | 0.97<br>(0.78 – 1.20) | 1.01<br>(0.49 – 2.09) | Placebo               |                       |                       |          |
| 0.60<br>(0.37 – 0.93) | 0.80<br>(0.51 – 1.25) | 0.83<br>(0.58 – 1.20) | 0.87<br>(0.60 – 1.30) | 0.92<br>(0.42 – 2.03) | 0.90<br>(0.66 – 1.25) | Losmapimod            |                       |          |
| 0.53<br>(0.32 – 0.83) | 0.70<br>(0.45 – 1.13) | 0.74<br>(0.50 – 1.09) | 0.77<br>(0.52 – 1.17) | 0.81<br>(0.37 – 1.81) | 0.80<br>(0.57 – 1.14) | 0.88<br>(0.56 – 1.43) | Veraspladib           |          |
| 0.28<br>(0.10 – 0.70) | 0.37<br>(0.13 – 0.95) | 0.39<br>(0.14 – 0.96) | 0.41<br>(0.15 – 1.02) | 0.43<br>(0.13 – 1.35) | 0.42<br>(0.16 – 1.03) | 0.47<br>(0.16 – 1.21) | 0.53<br>(0.18 – 1.36) | ANAKINRA |

Network plot

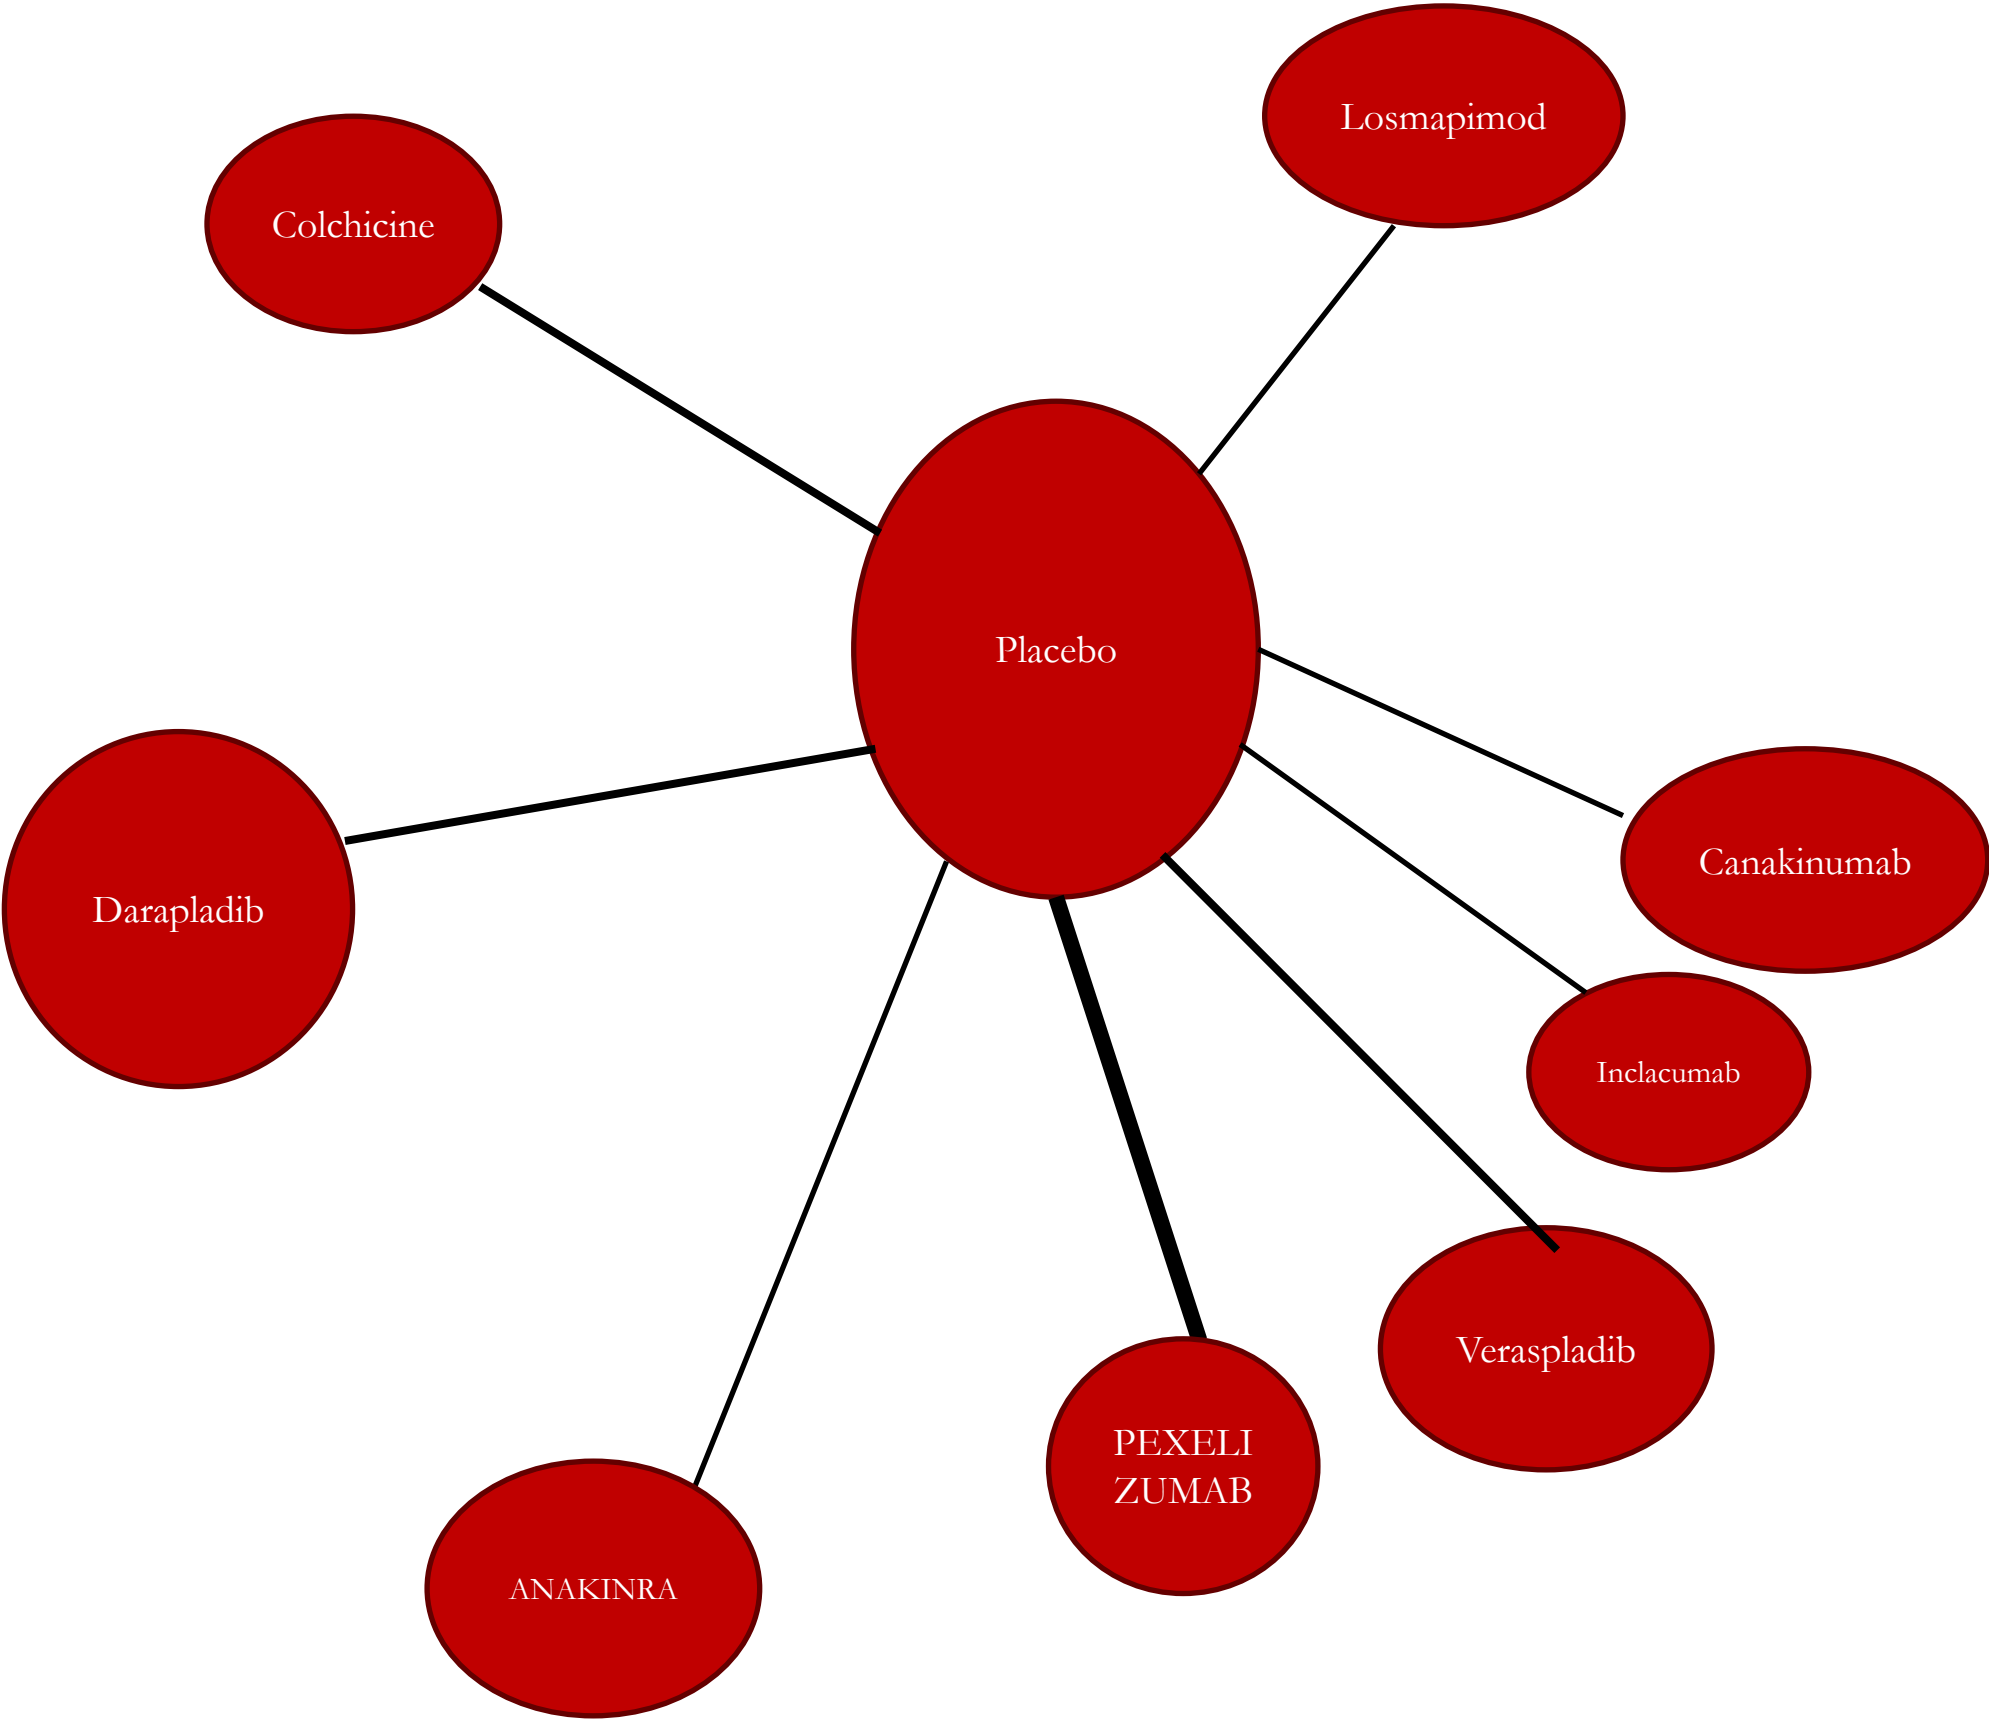

All cause mortality

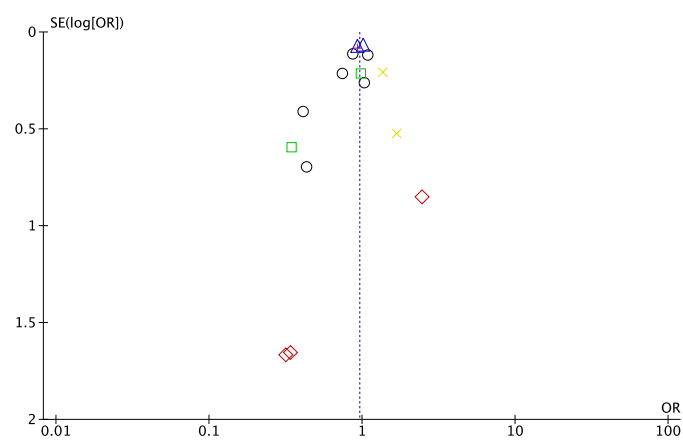

Cardiac mortality

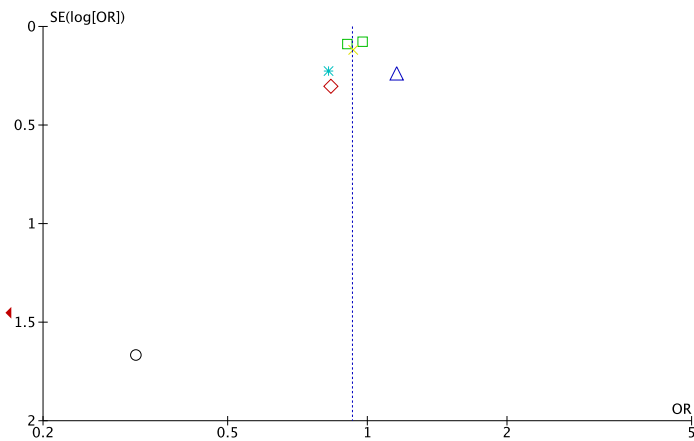

Stroke

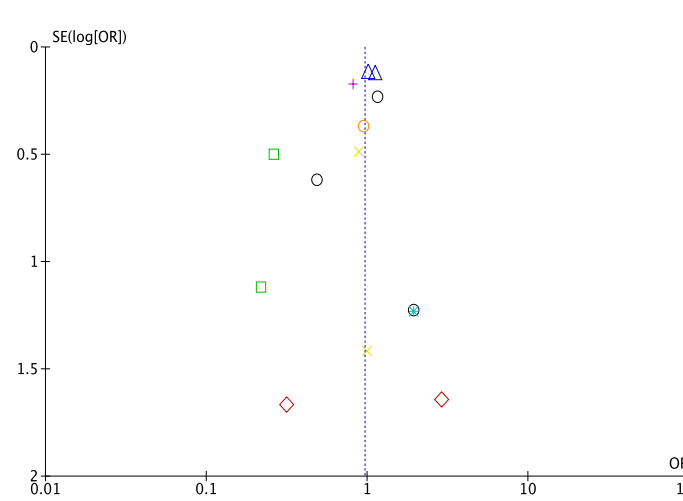

Revascularization

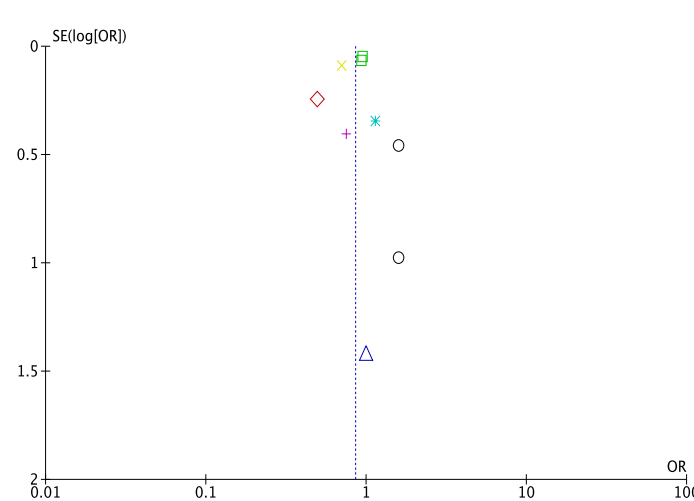

Myocardial infarction

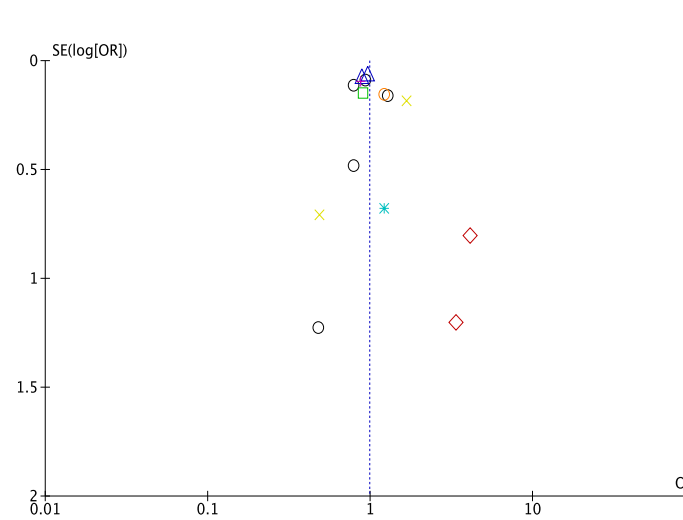

MACE

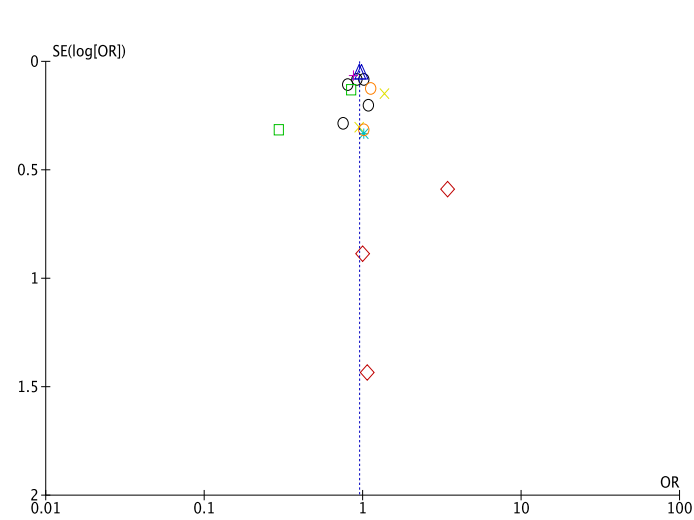



Inconsistency analysis

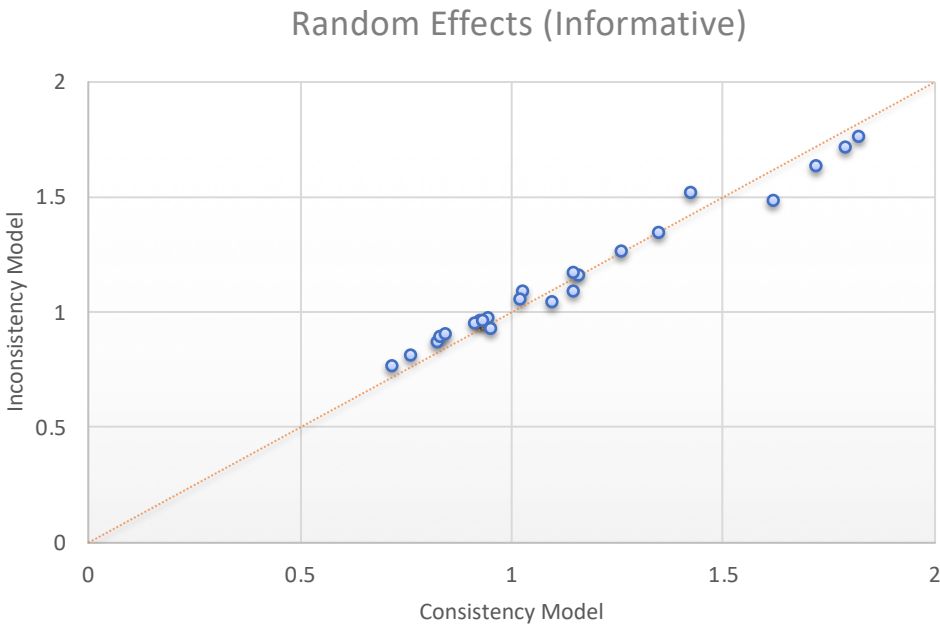

All-cause death

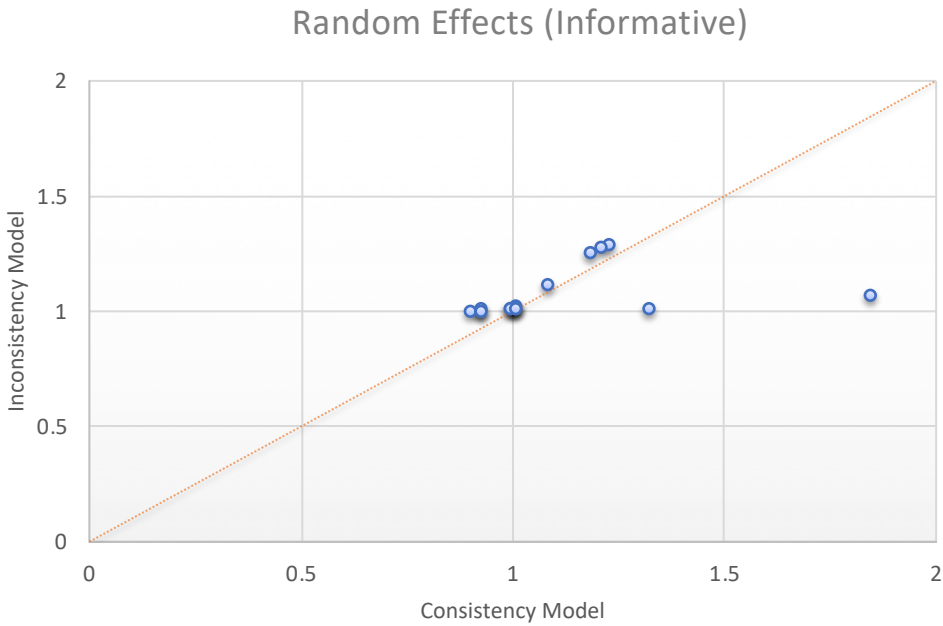

Cardiovascular death

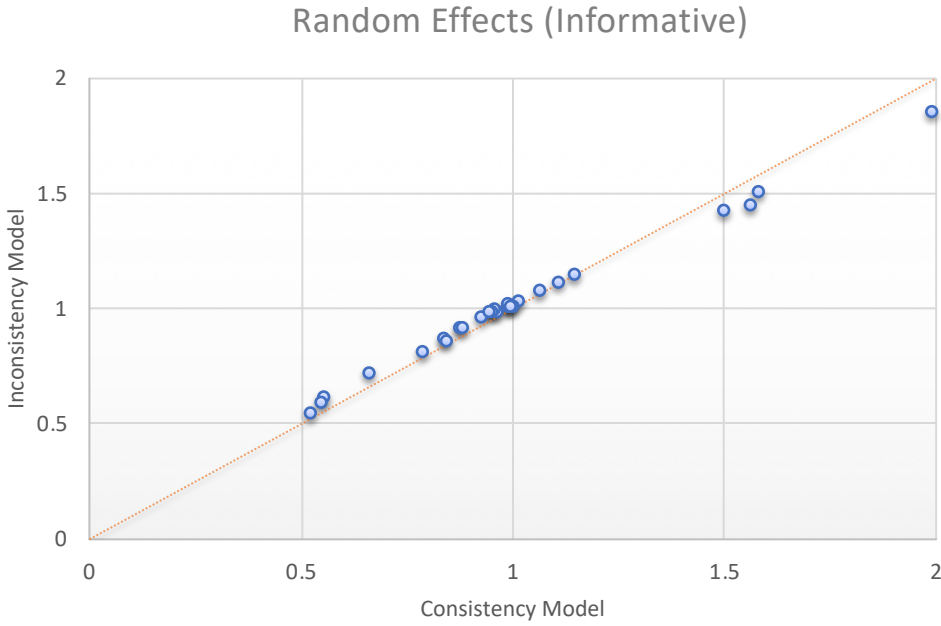

MI

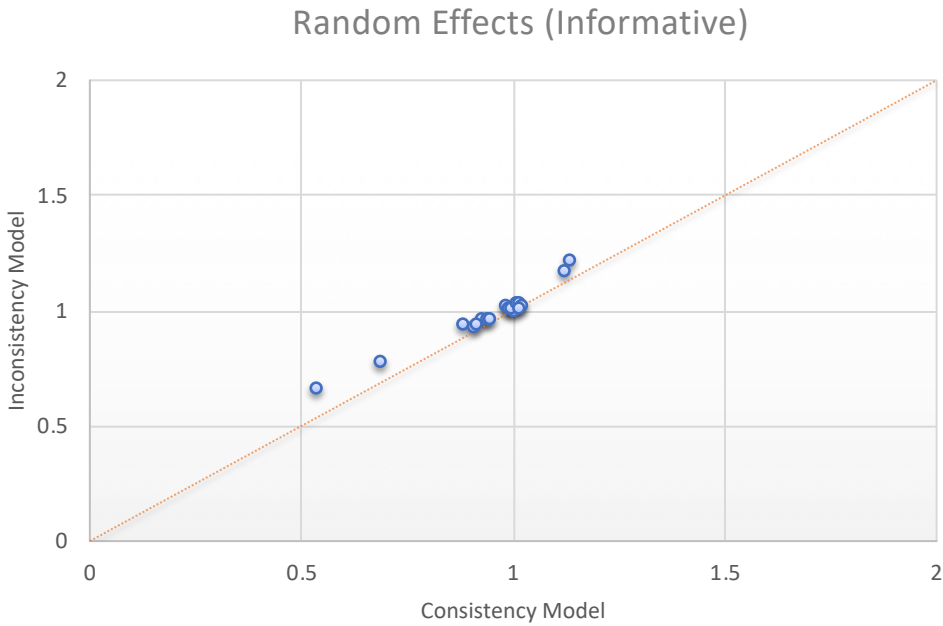

Revascularization

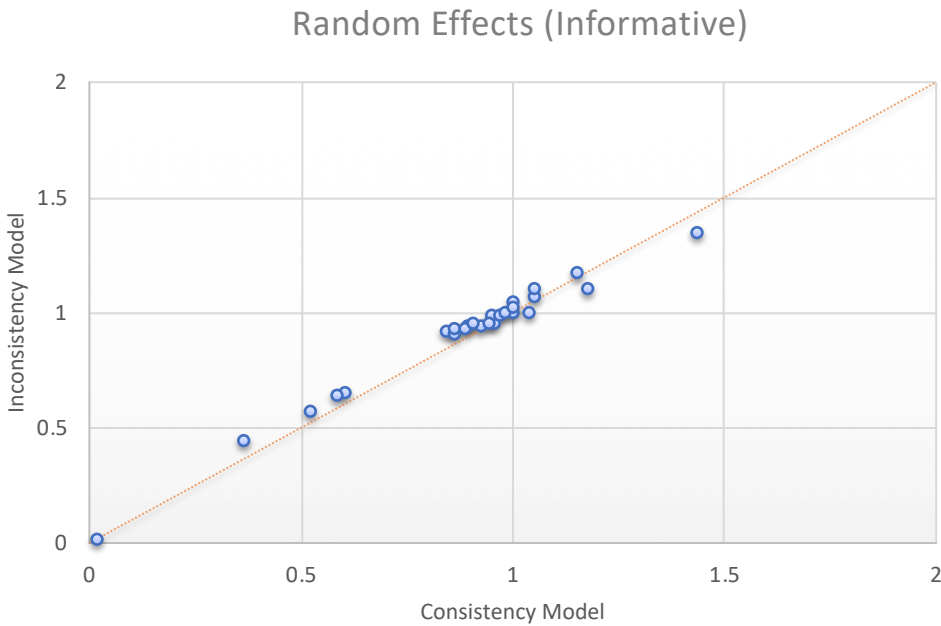

Stroke
